# Supplementary material for: Regulation of nitrogen reduction reaction catalytic performance by varying the sp/sp2 hybrid carbon ratio in graphyne/graphene heterojunction catalysts
Source: Royal Society of Chemistry journal article supplement (doi:10.1039/d5ta01226k), 2025-01-01
Supplement: d5ta01226k1.pdf [file d5ta01226k1.pdf]

# Supporting Information

## Regulation of nitrogen reduction reaction catalytic performance by varying sp/sp<sup>2</sup> hybrid carbon ratio in graphyne/graphene heterojunction catalysts

*Zexiang Yin<sup>1#</sup>, Zijun Yang<sup>1#</sup>, Yingmei Bian<sup>1</sup>, Heng Zhao<sup>1</sup>, Beijia Chen<sup>1</sup>, Yuan Liu<sup>3</sup>, Yang Wang<sup>1\*</sup>, Yida Deng<sup>1\*</sup>, Haozhi Wang<sup>1,2,4,5\*</sup>*

<sup>1</sup> State Key Laboratory of Tropic Ocean Engineering Materials and Materials Evaluation, School of Materials Science and Engineering, School of Mechanical and Electrical Engineering, Hainan University, Haikou, 570228 China

<sup>2</sup> Key Laboratory of Pico Electron Microscopy of Hainan Province, School of Materials Science and Engineering, Hainan University, Haikou, 570228 China

<sup>3</sup> State Key Laboratory of Precious Metal Functional Materials, School of Materials Science and Engineering, Tianjin University, Tianjin, 300072 China

<sup>4</sup> Key Laboratory of Advanced Energy Materials Chemistry (Ministry of Education), Nankai University, Tianjin, 300071 China

<sup>5</sup> Key Laboratory of Computational Physical Sciences (Ministry of Education), Fudan University, Shanghai, 200433 China

*#Zexiang Yin and Zijun Yang contributed equally to this work.*

### Computational Details

We used VASPKIT [Wang, V., Xu, N., Liu, J.-C., Tang, G. & Geng, W.-T. *Comput. Phys. Commun.*, 108033 (2021).] to construct heterojunction models of graphyne and graphene, ensuring that the lattice mismatch was kept below 5%. The models were selected based on the criteria that the benzene rings of graphyne and graphene are as aligned as possible, with a lattice pinch angle of 60° or 90°, and the total number of atoms in the structure does not exceed 200.

All computations were conducted using the Vienna Ab initio Simulation Package (VASP) with

spin-polarized first-principles method<sup>1,2</sup>. The projector augmented-wave (PAW) approach was employed to describe both core and valence electrons. The generalized gradient approximation (GGA) in the Perdew-Burke-Ernzerhof (PBE) form was used to characterize the electron-core interaction and exchange-correlation functions<sup>3-5</sup>. Electronic wave functions were expanded using a plane-wave basis with a kinetic energy cutoff of 400 eV. A 2×2×1 TM@GY supercell was utilized for the simulations, and a 15 Å vacuum layer was introduced vertically to the basal plane of the TM@GY supercell to mitigate spurious interlayer interactions. For geometric optimizations, a 2×2×1  $\Gamma$ -centered Gamma scheme k-mesh was employed to sample the first Brillouin zone. The total energy convergence was set to 10<sup>-5</sup>. The relaxation of all atoms was continued until the force acting on each atom was less than 0.01 eV/Å. To account for long-range van der Waals interactions, the DFT-D3 method was used<sup>6,7</sup>. To investigate the stability of TM@GY, ab initio molecular dynamics (AIMD) simulations were conducted based on the geometry-optimized results. The Nose heat bath was utilized to maintain a temperature of 300 K, with a time step of 1 fs. The total simulation time was set to 5 ps to achieve a thermodynamically balanced state.

The binding energy ( $E_b$ ) of the TM atom supported on GY is determined by the equation:

$$E_b = E_{\text{TM@GY}} - E_{\text{GY}} - E_{\text{TM}} \quad (1)$$

where  $E_{\text{TM@GY}}$  represents the total energy of the TM atom supported on GY, and  $E_{\text{GY}}$  and  $E_{\text{TM}}$  correspond to the energies of GY and a single TM atom, respectively.

The Gibbs free energy change ( $\Delta G$ ) for individual hydrogenation steps in the nitrogen reduction reaction (NRR) process was determined using the computational hydrogen electrode (CHE) model as proposed by Nørskov and collaborators.<sup>8,9</sup> The values of  $\Delta G$  for each step in the NRR were calculated using the following equation.:

$$\Delta G = \Delta E_{\text{DFT}} + \Delta E_{\text{ZPE}} - T\Delta S + \Delta G_{\text{U}} + \Delta G_{\text{pH}} \quad (2)$$

where  $\Delta E_{\text{DFT}}$  is the variation in electronic energy before and after the hydrogenation, directly determined through DFT calculations.  $\Delta E_{\text{ZPE}}$  and  $\Delta S$  denote the zero-point energy correction and entropy alteration, respectively, derived from frequency calculations at 298.15 K<sup>10</sup>.  $\Delta G_{\text{U}}$  accounts for the contribution of the applied electrode potential (U) to  $\Delta G$ , while  $\Delta G_{\text{pH}}$  corrects for the free energy change due to H<sup>+</sup>.

The Gibbs free energy of the adsorption of \*NNH intermediates on the catalysts is expressed as:

$$\Delta G_{*\text{NNH}} = \Delta G_{\text{TM@GY} + *\text{NNH}} - \Delta G_{\text{TM@GY}} - \Delta G_{\text{NNH}} \quad (3)$$

where  $\Delta G_{\text{NNH}}$  is determined as the sum of the Gibbs free energies of N<sub>2</sub> and 1/2H<sub>2</sub> molecules:

$$\Delta G_{\text{NNH}} = \Delta G_{\text{N}_2} + 1/2\Delta G_{\text{H}_2} \quad (4)$$

In these equations,  $\Delta G_{\text{TM@GY} + *\text{NNH}}$  and  $\Delta G_{\text{TM@GY}}$  represent the total Gibbs free energy of NNH species adsorbed on TM@GY, while  $\Delta G_{\text{N}_2}$  and  $\Delta G_{\text{H}_2}$  are the Gibbs free energies of N<sub>2</sub> and H<sub>2</sub> molecules, respectively. A similar approach is used to calculate the Gibbs free energy of other intermediates.

The Gibbs free energy barrier between two intermediates, such as between \*NNH and \*N<sub>2</sub>, is expressed as  $\Delta G_{*\text{NNH} - *\text{N}_2}$ :

$$\Delta G_{*\text{NNH} - *\text{N}_2} = \Delta G_{*\text{NNH}} - \Delta G_{*\text{N}_2} \quad (5)$$

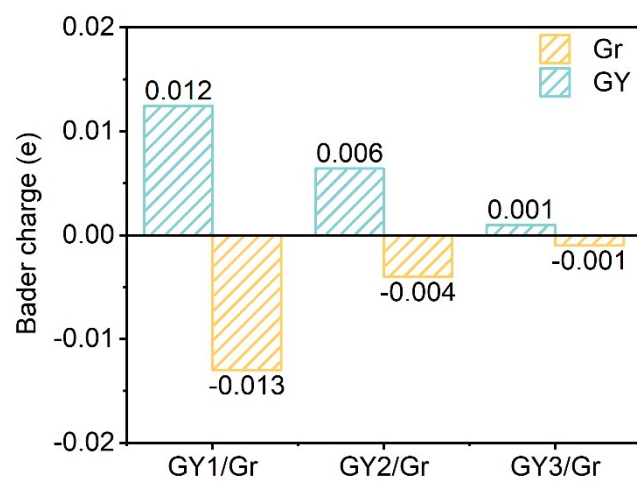

Fig. S1 The average value of the Bader charge projected onto each atom of GY and Gr in the GY/Gr.

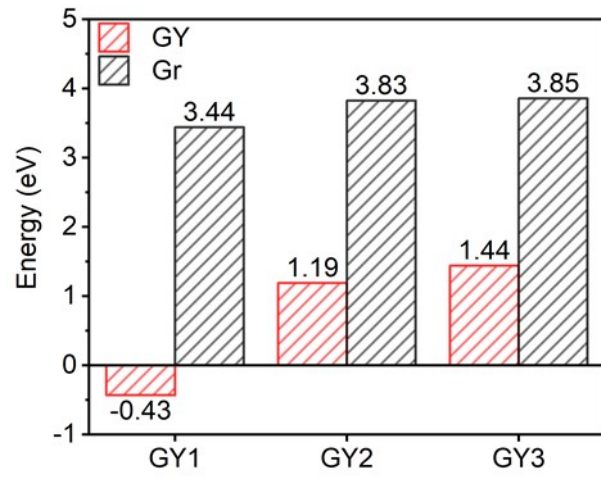

Fig. S2 Ti adsorption energy on GY and Gr.

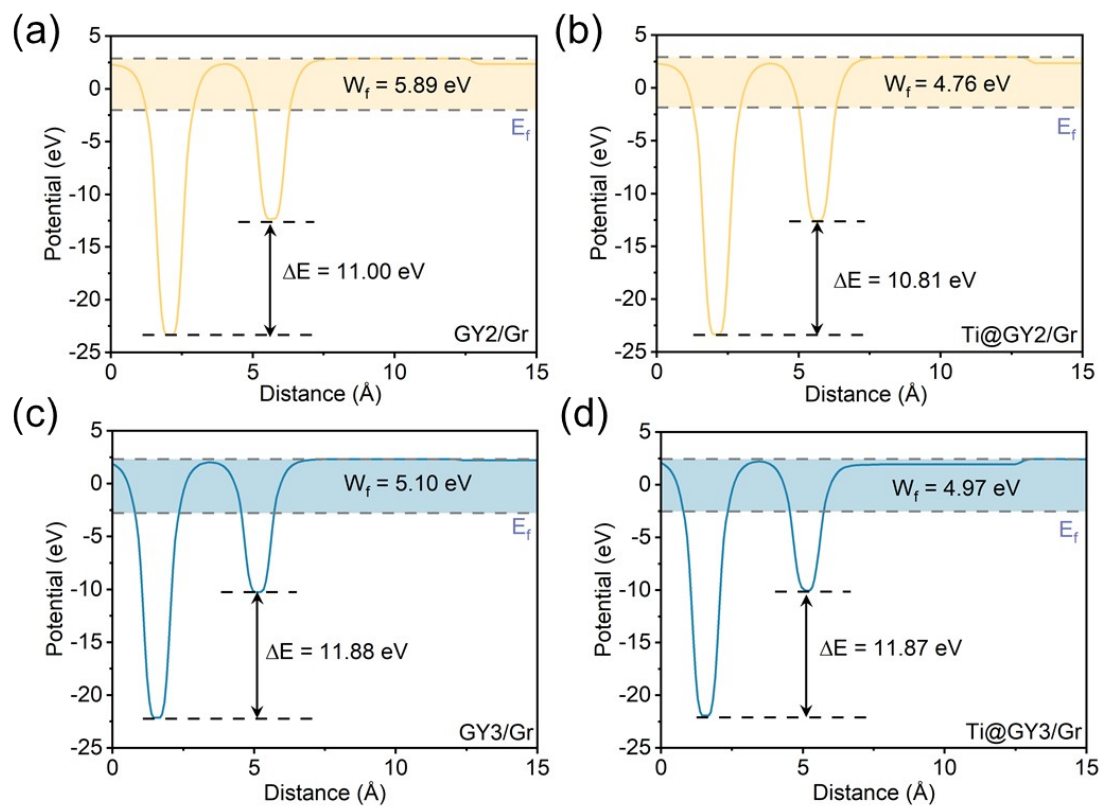

Fig. S3 (a-d) The work function of GY2/Gr, Ti@GY2/Gr, GY3/Gr and Ti@GY3/Gr respectively.

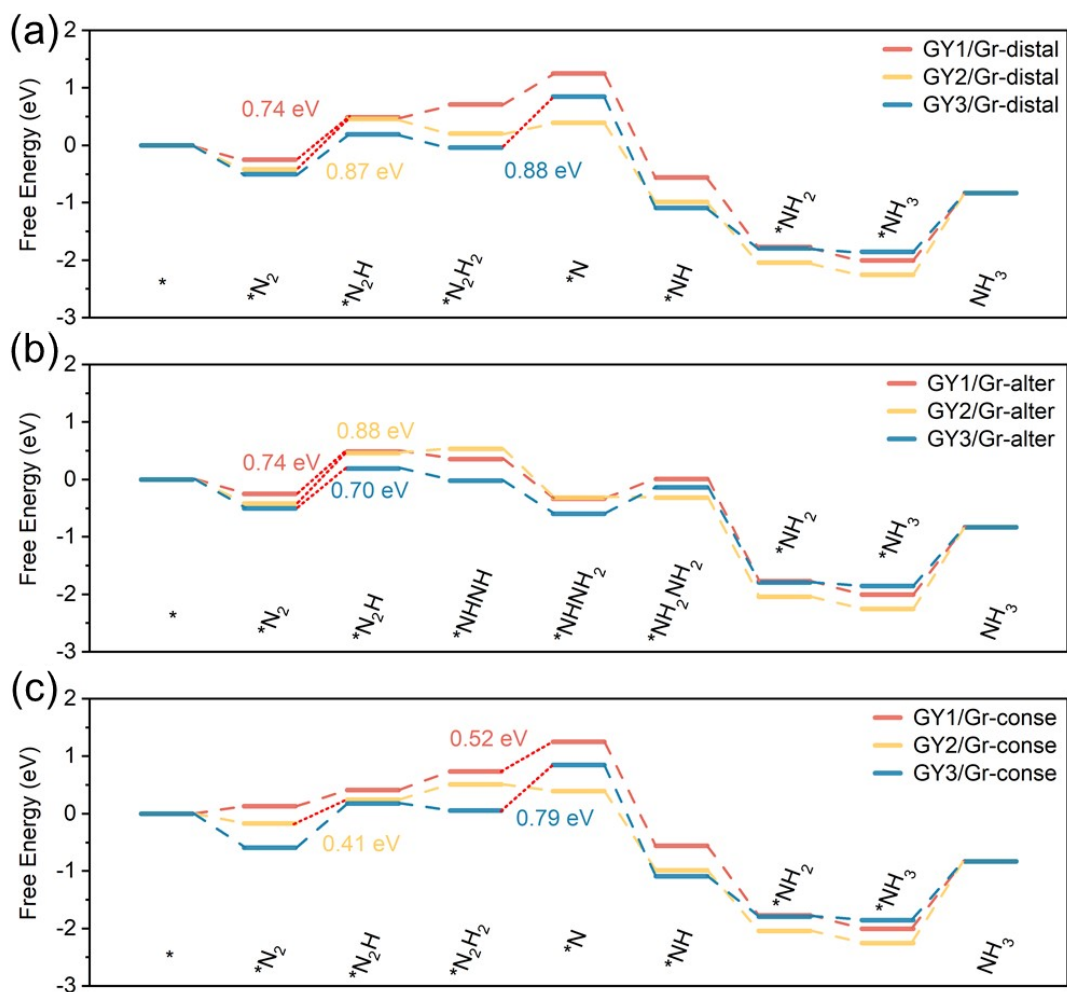

Fig. S4 NRR energy step diagrams of Ti@GY1/Gr, Ti@GY2/Gr and Ti@GY3/Gr for (a) distal, (b) alternating and (c) consecutive paths respectively.

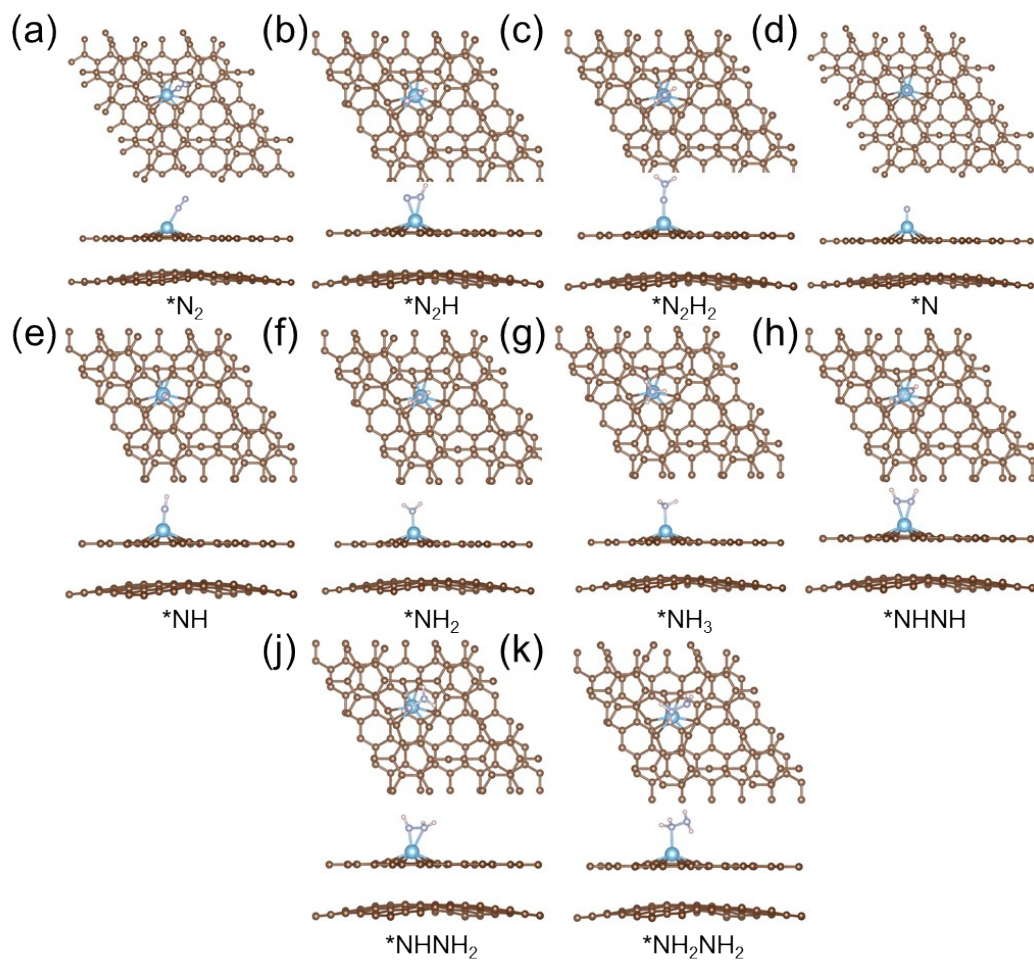

Fig. S5 Structure of all intermediates for distal and alternating paths on Ti@GY1/Gr.



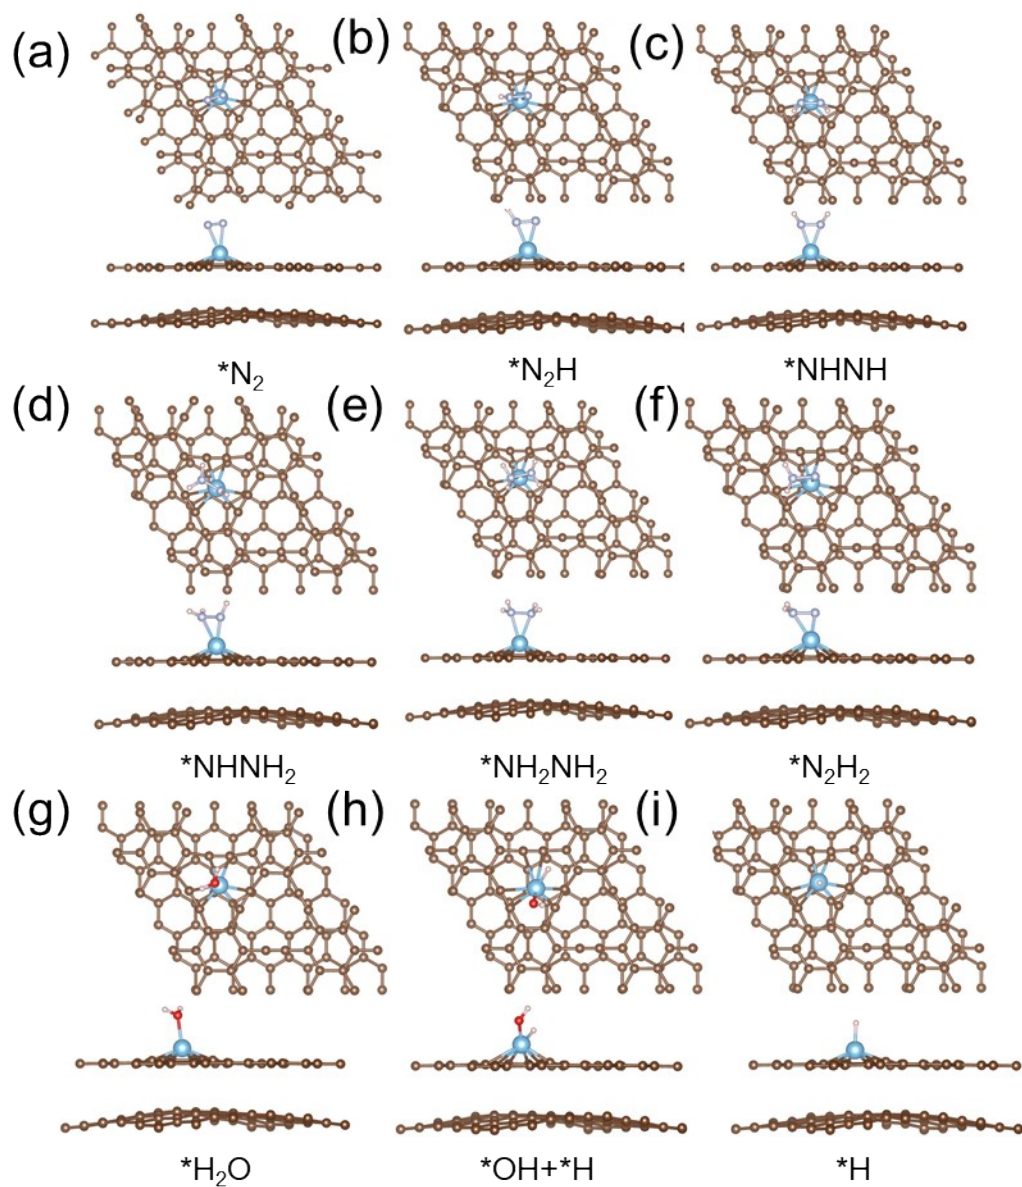

Fig. S6 Structure of all intermediates for consecutive, enzymatic and hydrogen evolution reaction paths on Ti@GY1/Gr.

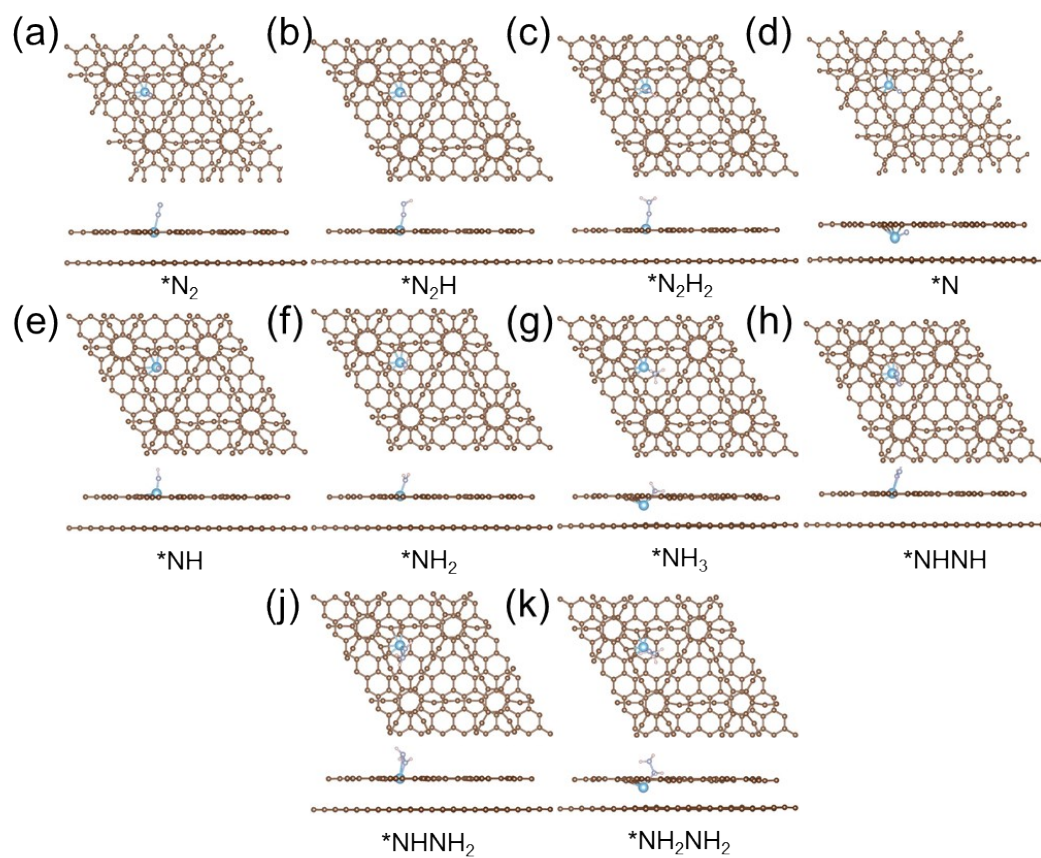

Fig. S7 Structure of all intermediates for distal and alternating paths on Ti@GY2/Gr.

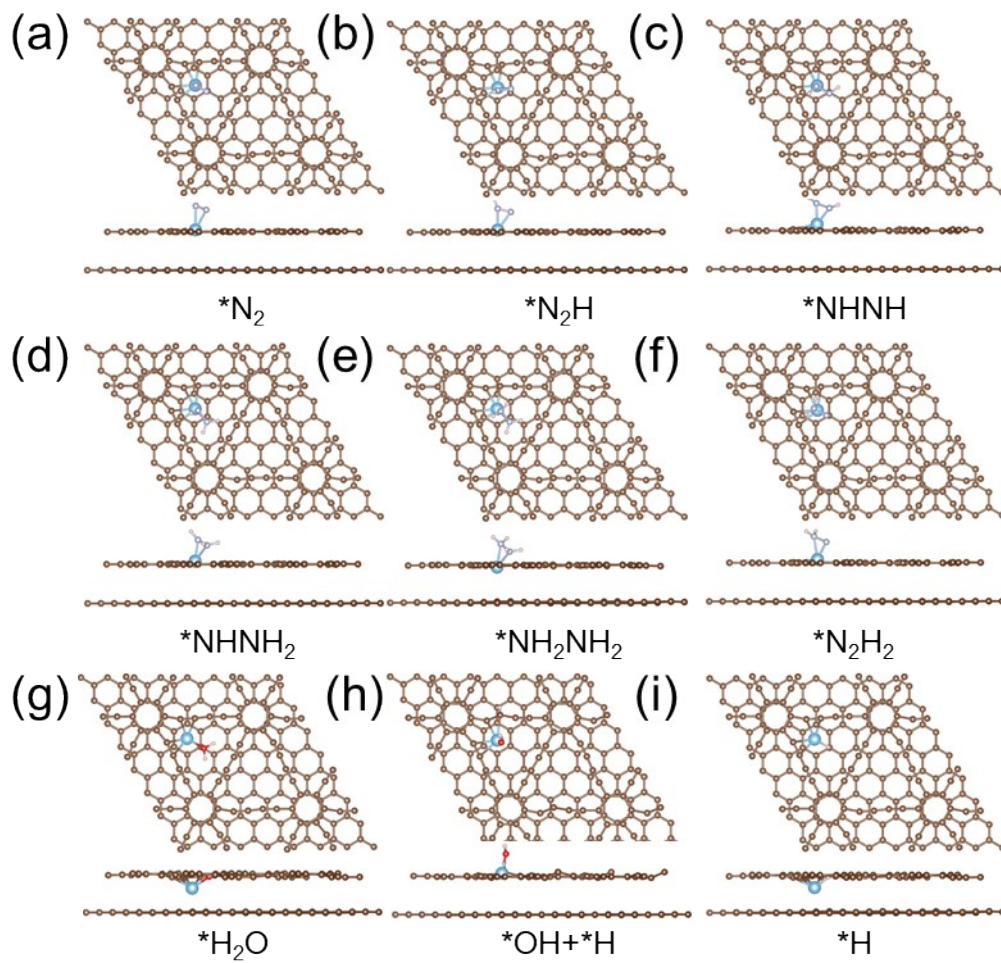

Fig. S8 Structure of all intermediates for consecutive, enzymatic and hydrogen evolution reaction paths on Ti@GY2/Gr.

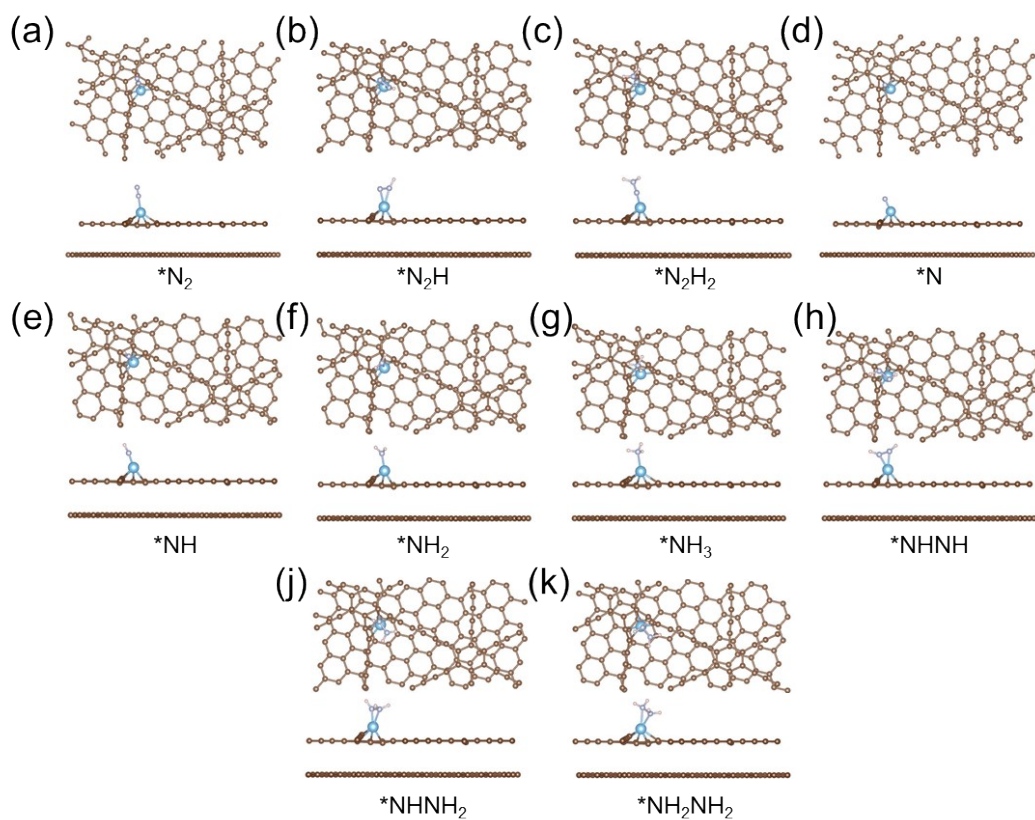

Fig. S9 Structure of all intermediates for distal and alternating paths on Ti@GY3/Gr.



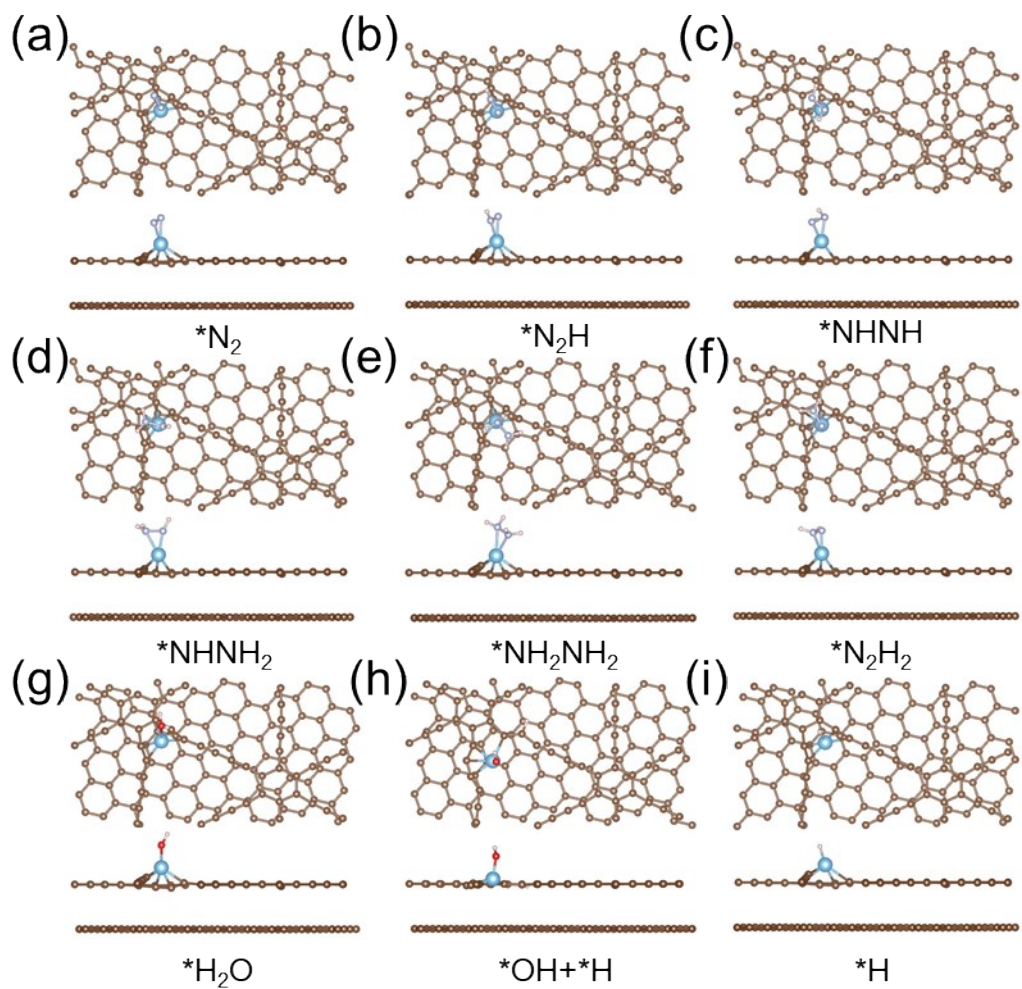

Fig. S10 Structure of all intermediates for consecutive, enzy and hydrogen evolution reaction paths on Ti@GY3/Gr.

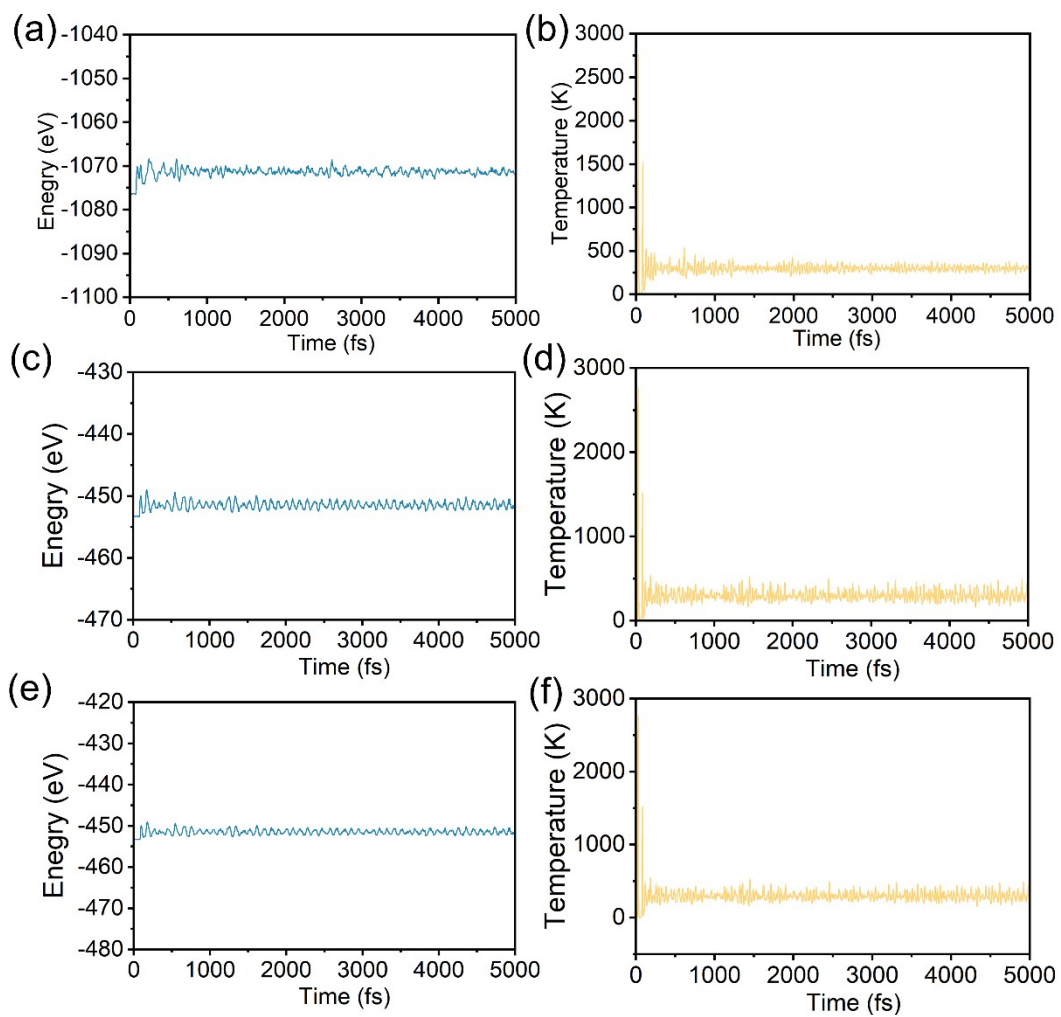

Fig. S11 (a, c, e) Energy and (b, d, f) temperature changes over time for AIMD simulation of Ti@GY1/Gr, Ti@GY2/Gr and Ti@GY3/Gr at 300 K.

## References

- 1 G. Kresse and J. Hafner, *Phys. Rev. B*, 1993, **48**, 13115–13118.
- 2 G. Kresse and J. Hafner, *Phys. Rev. B*, 1993, **47**, 558–561.
- 3 G. Kresse and D. Joubert, *Phys. Rev. B*, 1999, **59**, 1758–1775.
- 4 J. P. Perdew and Y. Wang, *Phys. Rev. B*, 1992, **45**, 13244–13249.
- 5 J. P. Perdew, K. Burke and M. Ernzerhof, *Phys. Rev. Lett.*, 1996, **77**, 3865–3868.
- 6 S. Grimme, J. Antony, S. Ehrlich and H. Krieg, *J. Chem. Phys.*, 2010, **132**, 154104.
- 7 G. Makov and M. C. Payne, *Phys. Rev. B*, 1995, **51**, 4014–4022.
- 8 Noskov, J. K., Rossmeisl, J., Logadottir, A., Lindqvist, L., Kitchin, J. R., Bligaard, T., & Jonsson, H. *J. Phys. Chem. B*, 2004, **108**, 17886–17892.
- 9 J. Rossmeisl, A. Logadottir and J. K. Nørskov, *Chem. Phys.*, 2005, **319**, 178–184.
- 10 V. Wang, N. Xu, J.-C. Liu, G. Tang and W.-T. Geng, *Comput. Phys. Commun.*, 2021, **267**, 108033.
